# Supplementary material for: Molecular-level understanding of the adsorption mechanism of a graphite-binding peptide at the water/graphite interface
Source: Royal Society of Chemistry journal article supplement (doi:10.1039/c5sm00123d), 2015-01-01
Supplement: c5sm00123d2.pdf [file c5sm00123d2.pdf]

## Supporting Information

# Molecular-level understanding of the adsorption mechanism of a graphite-binding peptide at the water/graphite interface

Matthew J. Penna<sup>a,b</sup>, Milan Mijajlovic<sup>a</sup>, C. Tamerler,<sup>c</sup> and Mark J. Biggs<sup>a,d\*</sup>

<sup>a</sup> School of Chemical Engineering, The University of Adelaide, Adelaide, South Australia, Australia, 5005.

<sup>b</sup> School of Aerospace, Mechanical and Manufacturing Engineering, RMIT University, GPO Box 2476, Victoria, Australia, 3001.

<sup>c</sup> Department of Mechanical Engineering, University of Kansas, 1530 W 15th Street, 3138 Learned Hall, Lawrence, KS 66045, USA.

<sup>d</sup> School of Science, Loughborough University, Leicestershire, United Kingdom, LE11 3 TU.

## 1. Additional relevant results and analysis.

### 1.1 Full trajectory for exemplar run.

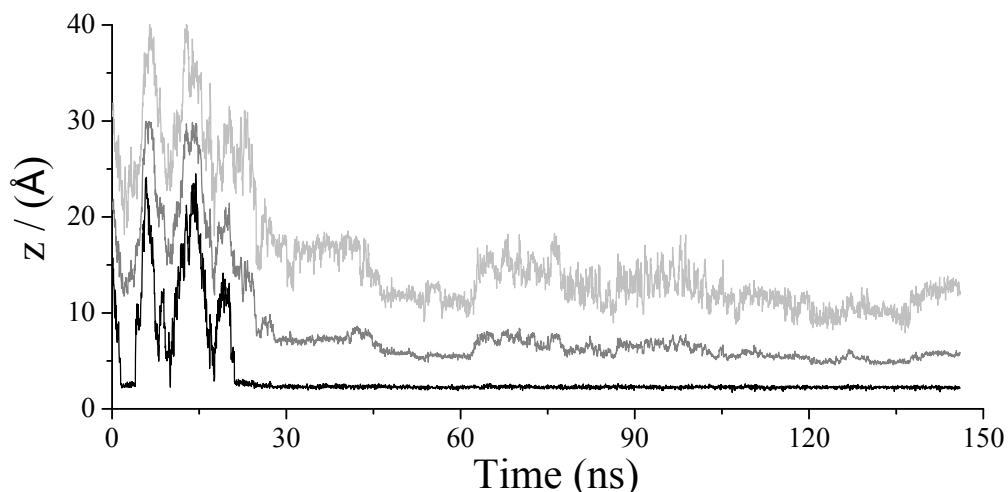

**Figure S1.** Full trajectory for the exemplar run subdivided into Figure 3, Figure 4 and Figure 5. SSD<sub>MIN</sub> (black), SSD<sub>COM</sub> (dark grey), SSD<sub>MAX</sub> (light gray).

## 1.2 Peptide-surface interaction energy for exemplar run.

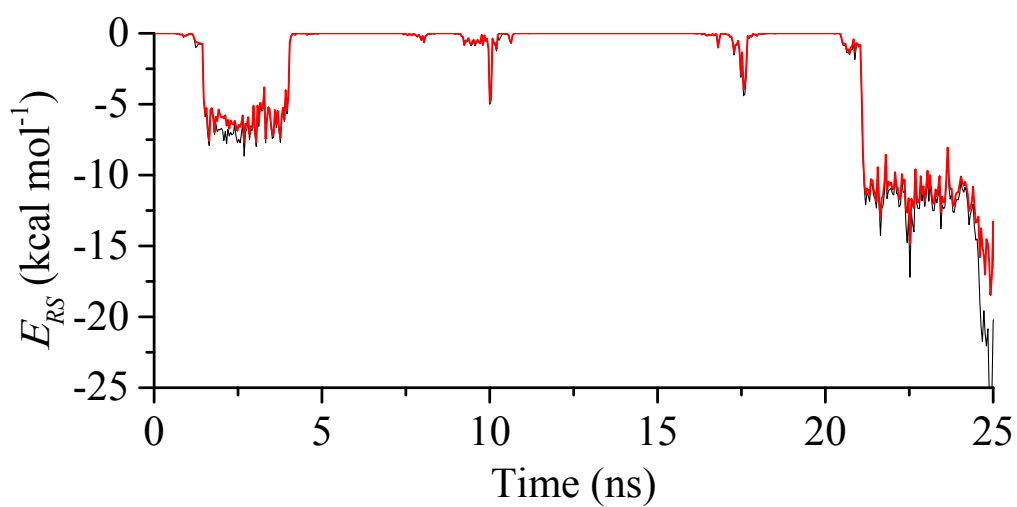

**Figure S2.** Total interaction energy between peptide and surface,  $E_{PS}$ , (black) and the interaction energy between residues Ile<sub>1</sub>, Tyr<sub>9</sub> and Tyr<sub>12</sub> and the surface (red).

## 1.3 MSD data.

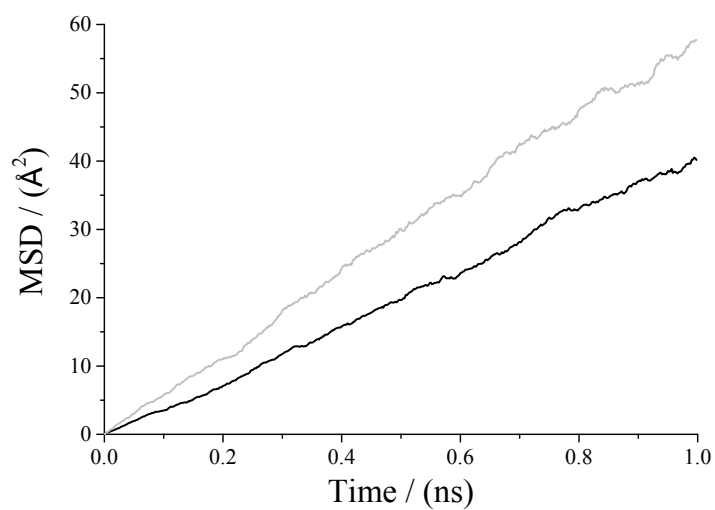

**Figure S3.** MSD for GrBP5 in the adsorbed (black) and bulk (light gray) states.
